# Supplementary material for: Explainable artificial intelligence for mental health through transparency and interpretability for understandability
Source: PubMed Central journal article supplement (PMC9849399; doi:10.1038/s41746-023-00751-9), 2023-01-18
Supplement: 41746_2023_751_MOESM1_ESM.pdf [file 41746_2023_751_MOESM1_ESM.pdf]

# **Explainable Artificial Intelligence for Mental Health through Transparency and Interpretability for Understandability (Supplementary Information)**

Dan W Joyce<sup>\*,1,3</sup>, Andrey Kormilitzin<sup>1</sup>,  
Katharine Smith<sup>1</sup> and Andrea Cipriani<sup>1,2</sup>

<sup>1</sup>University of Oxford, Department of Psychiatry, Warneford Hospital, Oxford, United Kingdom, OX3 7JX

<sup>2</sup>Oxford Precision Psychiatry Lab, NIHR Oxford Health Biomedical Research Centre, Warneford Hospital, Oxford, United Kingdom, OX3 7JX

<sup>3</sup>Institute of Population Health, Department of Primary Care and Mental Health, University of Liverpool, Liverpool, L69 3GF

\*Corresponding author; email: danjoyce@liverpool.ac.uk

## 1 **Search Method**

2 For the literature reviewed in Table 1: Data were extracted from PubMed / Med-  
3 Line using the search: (explaina\*) AND ("artificial intelligence" OR "machine  
4 learning") AND ("mental health" OR "psychiatry") in the title and abstract fields.

5 The date range was 1st January 2018 through 12th April 2022 and extracted on  
6 the latter date. The search delivered 32 papers, of which 7 were excluded as they  
7 addressed applications in 1) surgical mortality 2) an editorial preface to a special is-  
8 sue 3) psychophysics of visual perception 4) inflammatory processes in osteoarthritis 5)  
9 polypharmacy (only tangentially linked to psychiatry) 6) quantifying altered states of  
10 consciousness and 7) feature set selection in osteoarthritis.

11 The full-text of the remaining 25 papers were reviewed and the 15 which presented  
12 original research retained.

## 13 **Literature Summary**

14 For papers reporting original research, we assessed the following properties:

- 15 • the broad domain addressed in the research: most studies were on survey or neu-  
16 roimaging data, with one examining physiological data
- 17 • the intended application (i.e. AI for prediction/forecasting, discovery or decision  
18 making/decision support ): finding that most studies contained a prediction and  
19 discovery component
- 20 • what AI/ML methods were used: in most survey-based papers, multiple methods  
21 were compared especially in applications where prediction performance was tested  
22 and in neuroimaging, deep learning methods dominated
- 23 • which XAI methods were used: we grouped these into feature importance, ex-  
24 plainability “by design”, causal inference and presentation/visualisation methods

25 finding that feature importance methods dominated across applications

- 26 • whether the research evaluated the claimed “explainability”: finding that in papers  
27 using survey data, evaluation was more commonly reported
- 28 • whether the research deferred “explainability” to the technical method used: find-  
29 ing that half of survey data-based applications deferred to the method; in papers  
30 that did not define explainability in their application, they always deferred to the  
31 method used (e.g. in all of the neuroimaging studies)

32 Of note, we did not rate the quality of definitions (i.e. whether or not they were  
33 detailed or precise) – rather, we examined if the paper made any attempt to define terms  
34 such as “explainability” beyond stating that it was merely important or necessary.

## 35 **A Tutorial Example of Structure and Function**

36 To motivate our discussion of structure and function in the TIFU framework, we in-  
37 troduce a simple toy example of recommending whether or not a patient should receive  
38 antidepressant medication based on seven predictor variables; the patient’s age, natal  
39 sex, history of previous major depressive episodes, previous treatment with medication  
40 and/or psychotherapy as well as the current episode severity and duration in weeks. We  
41 simulated 3759 patients where the decision to offer medication was a non-linear function  
42 of the seven predictor variables and divided this into a training and testing set of 2643  
43 and 1116 samples respectively.

44

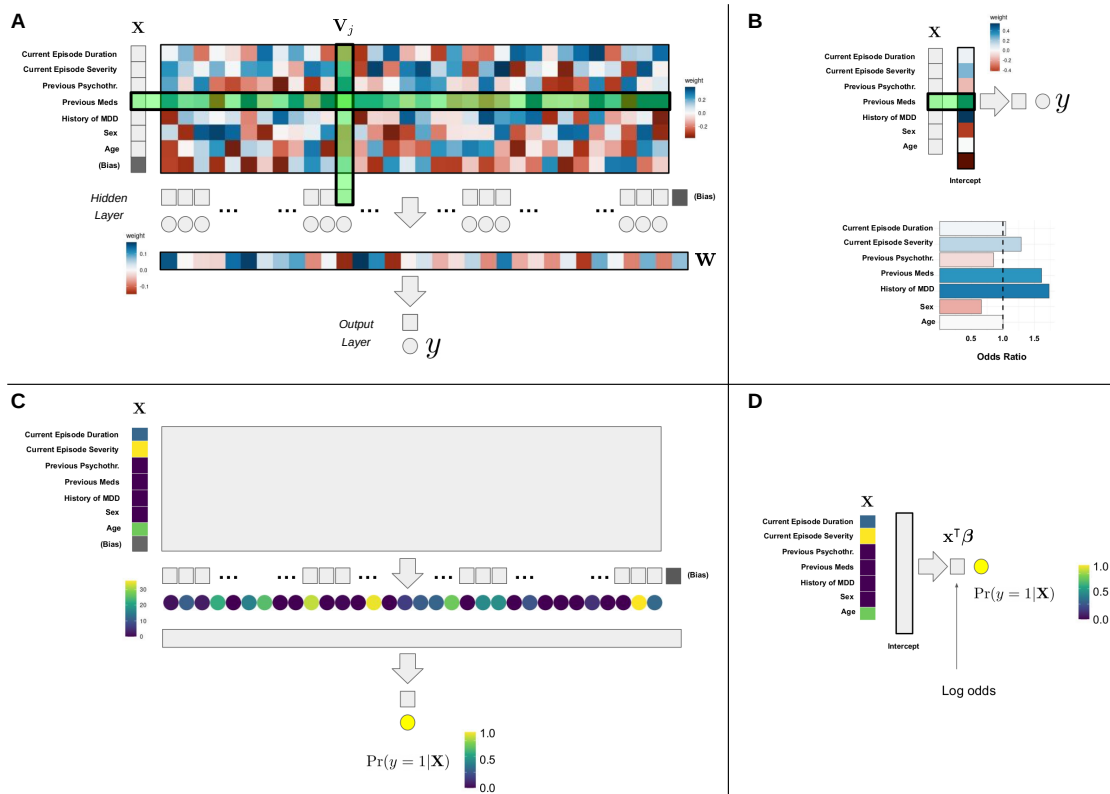

Supplementary Figure 1: Structure and Function in a Toy Model to Predict Antidepressant Prescribing from Clinical Characteristics: (A) The **structure** of a simple neural network consisting of a 7-node input layer fully (densely) connected to a 32-node hidden layer, fully connected to a single output node. Grey squares indicate computations over the preceding layer's outputs; grey circles represent (usually non-linear) operations or activation functions. (B) the structure of an equivalent logistic regression model for the same problem presented using the same description of weights (parameters) and operations (weighted linear sums and activation functions). (C) The **function** of the neural network showing an example patient and the pattern of activations as computations proceed ("feedforward") from the input to output layer via the hidden layer. (D) The same example patient being "fed-forward" in the logistic regression model

45 In Supplementary Figure 1, we show the **structure** of a feedforward neural network  
 46 model (panel A) with 7 inputs nodes, each corresponding directly to one of seven pre-

47 predictor variables. We perform no feature engineering on this data so that the inputs to  
48 the model directly correspond to the clinical variables used to make predictions. In this  
49 feed-forward network, the layer of input nodes therefore have *activations* identical to the  
50 values of the inputs (denoted by the column vector  $\mathbf{x}$ ). This input layer is densely (fully)  
51 connected to 32 hidden nodes by a matrix of adjustable weights  $\mathbf{V}$  (or parameters) shown  
52 as the rectangular red/blue coloured matrix; this is to enable the hidden layer to capture  
53 interactions or more precisely, representations of the input as linear weighted sums the  
54 input variables. The outputs of the hidden nodes are then transformed through another  
55 vector of weights  $\mathbf{w}$  which transform the outputs of the hidden layer to a single output  
56 node  $y$  whose output is proportional to the probability of offering (or not) antidepressant  
57 medication ( $y = 1$  or  $0$  respectively).

58 The **function** of the network can be visualised as a pattern of activations propogating  
59 through the network (panel C) as follows; each input node has activation identical to the  
60 values of the predictor (input) variables – shown as the coloured squares for an example  
61 patient at the left of panel C. This example patient has the following characteristics  
62 (corresponding to the visual representation in panels C and D): they are a 46 year old  
63 female, with no previous history of MDD, medication or psychotherapy treatment and  
64 with a MADRS score of 60 and episode duration of 20 weeks. The logistic regression  
65 model and the neural network recommend antidepressant medication with probability  
66  $\Pr(y = 1|\mathbf{x}) = 0.99$ .

67 These activations feed-forward to the hidden layer where each node computes a net  
68 input (shown as grey squares) as a weighted sum  $a_j = \mathbf{x}^T \mathbf{V}_j$  where  $\mathbf{V}_j$  is the column  
69 vector (e.g. the vertical green bar in panel A) of the weights connecting the hidden  
70 node  $j$  to every input node  $i$ . Conversely, this means the effect of an isolated input  
71 node  $i$  is “distributed” over *all* hidden nodes – illustrated by the horizontal green bar  
72 in panel A. Next, each hidden node computes it’s activations by taking the net input  $a_j$   
73 and delivering an output through a rectified linear activation (ReLU) function  $f(a_j) =$

74  $\max(0, a_j)$  – represented in panel C as the row of coloured circles. ReLU hidden nodes  
 75 effectively “switch off” hidden nodes where the net input  $a_j$  falls below a threshold which  
 76 by convention, is modelled using a so-called bias node that can be viewed as similar to  
 77 the intercept in a traditional linear regression model. Finally, the output layer has only  
 78 a *single* node that, similarly, computes a linear weighted sum of inputs (i.e. the outputs  
 79 of the hidden layer):  $b = \mathbf{f}\mathbf{w}^\top$  (this operation is again shown as a grey square) where  $\mathbf{f}$  is  
 80 the row vector of 33 hidden-layer node outputs (32 hidden nodes plus a single bias node)  
 81 and  $\mathbf{w}$  is a row vector of weights connecting every hidden node to the output  $y$ . Instead  
 82 of a ReLU function, however, the output node  $y$  computes a sigmoid (logistic) function  
 83 of it’s inputs resulting in  $y = g(\mathbf{f}) = \frac{1}{1+\exp(-\mathbf{f})}$  which approximates the probability  
 84 that a patient ( $\mathbf{x}$ ) is recommended a prescription for antidepressant treatment. For  
 85 completeness, the weights  $\mathbf{V}$  and  $\mathbf{w}$  were estimated using stochastic gradient descent.  
 86 Note that the final output of the network,  $y$ , can be written compactly as a sequence  
 87 of function compositions:  $y = g(f(\mathbf{x}))$  or equivalently  $y = g \circ f$ , emphasising that the  
 88 output depends on the input passing through one layer of computations ( $f$ ) which feed  
 89 into the second layer ( $g$ ) to arrive at the output ( $y$ ). The “deeper” the network, the  
 90 more function compositions are involved.

91 Contrast with a logistic regression model shown in panel B; here, we have adopted the  
 92 same diagrammatic convention of showing the structure as weights (commonly referred  
 93 to as “betas” or the coefficients of the model) and computations (panel D) where the  
 94 input  $x$  is multiplied by the weights  $\beta$  (grey square) and then transformed via a sigmoid  
 95 or logistic function (grey circle) to arrive at an output proportional to the probability  
 96 of recommending an antidepressant. In essence, logistic regression can be viewed as a  
 97 trivially-simple neural network without hidden layers, where the input layer is densely  
 98 and directly connected to the output node. The weights/parameters are estimated using  
 99 an iteratively re-weighted least squares algorithm. The output of the logistic regression  
 100 is a single function of the input:  $y = g(\mathbf{x}) = \frac{1}{1+\exp(-\mathbf{x}^\top\beta)}$

101 Both models provide the same behaviour when seen as a “black box” – that is, mod-  
102 elling the probability of recommending an antidepressant *given* a patient’s characteristics  
103 but they achieve this through differing model **structure** (architecture) and **functions**  
104 (computations). Relevant to the TIFU concept, the neural network allows for more  
105 flexible representations by virtue of the input activations being “distributed” over the  
106 hidden layer nodes. The logistic regression model can only account for weighted linear  
107 sums of the seven input variables – meaning that there are no modelled interactions  
108 between variables.

109 To **understand** how the neural network arrives at an output, we must recognise  
110 the output ( $y$ ) results from two function compositions of multivariate inputs, neither of  
111 which have *prima-facie* **transparency** with respect to the input  $\mathbf{X}$  or outputs  $y$  and  
112  $\Pr(y = 1|\mathbf{X})$ .

113 Contrast with the logistic regression model (panel B) where the weights/parameters  
114 (**structure**) possess a well-developed formal relationship to the predictor variables i.e.  
115 exponentiating the weights yields the direct **interpretation** of each predictor variable  
116 having an associated odds ratio. Similarly, the function of the logistic regression model  
117 can be easily interpreted – the weighted sum  $\mathbf{x}^T\boldsymbol{\beta}$  (computed by the grey square in  
118 panel D) is the log odds or probability of  $y = 1$  on the logit scale [1]. The computation  
119 performed over the weighted sum (the grey circle in panel B and C) is the logistic function  
120 which maps log odds to the probability scale resulting in  $\Pr(y = 1|\mathbf{X})$ . In the logistic  
121 regression model, we retain the inputs-to-model structure (odds ratios) and function  
122 (the effect on  $\Pr(y = 1|\mathbf{X})$  of selectively modifying one or more inputs holding all others  
123 constant) offering interpretability by design.

124

125 Supplementary Figure 2 shows that we can qualitatively visualise the outputs of the  
126 hidden layer  $f(\cdot)$  in an attempt to provide interpretability of the function of the model

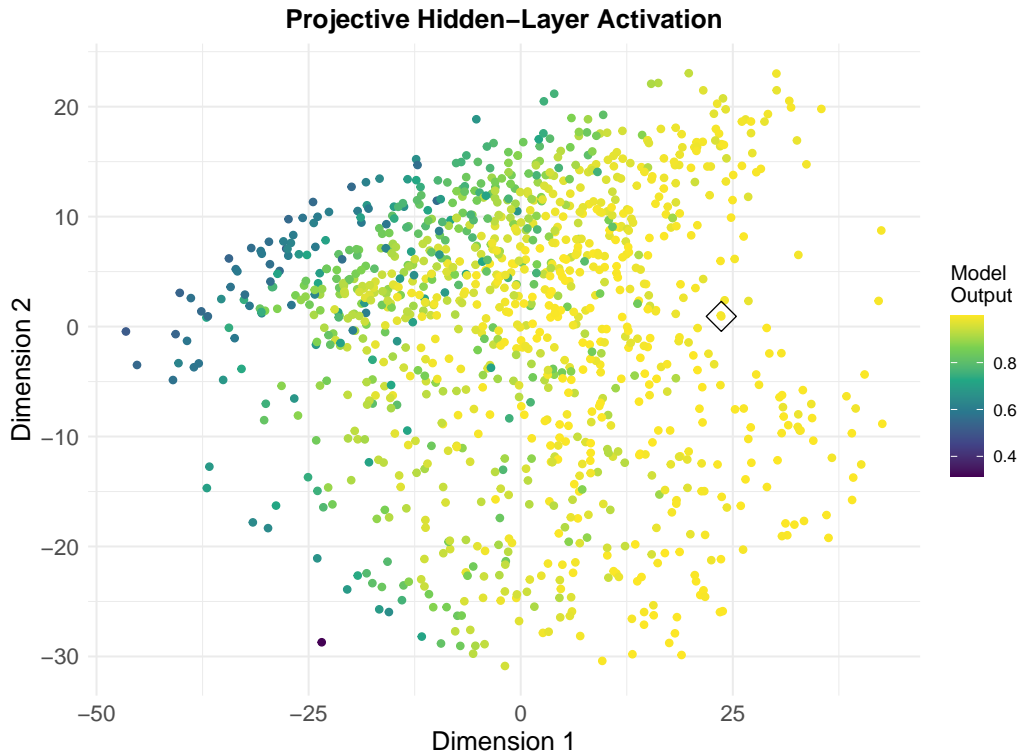

Supplementary Figure 2: Two-dimensional projection (by metric multidimensional scaling) of the activations of the 32 hidden layer nodes ( $\mathbf{f}$ ) induced by each of 1116 patients, where the colour represents the model’s output,  $\Pr(y = 1|\mathbf{x})$ . The black diamond shows the location corresponding to the example patient from Supplementary Figure 1

127 with respect to the outputs. We use metric multidimensional scaling [2] to “project”  
 128 the native 32 dimensional space of activations into two, unitless dimensions that stand  
 129 in correspondence to the inputs in a non-trivial way; for example, the patient from  
 130 Supplementary Figure 1 is a 46 year old female with no treatment or depression his-  
 131 tory presenting with severe symptoms of duration 20 weeks and the location in this  
 132 dimensionality-reduced space of activations is shown with a black diamond. There is no  
 133 straight-forward way of directly mapping these input variables to the two-dimensional  
 134 space of activations in a way that would be transparent or interpretable. Further, at  
 135 least as we present here, the presentation of this information does not help us with ab-



136 ductive (or inductive) reasoning about why this recommendation was made. While the  
137 projection shows some qualitative pattern in relation to the probability of being recom-  
138 mended an antidepressant medication, it is far from clear how to *use* this to aid human  
139 interpretation.

140 In summary, the model becomes further removed from *prima facie* interpretability  
141 as a consequence of the structure (architecture of the model) and function (i.e. corre-  
142 sponding to the depth or number of function compositions). We should note two further  
143 points: i) that the example “toy” neural network presented is substantially less complex  
144 compared to a typical application of deep learning in contemporary AI/ML and ii) with  
145 some knowledge of linear algebra, we could describe a systematic relationship between  
146 the inputs and hidden-layer nodes’ net inputs (structure and function), but this is com-  
147 plicated by there being a non-linear function  $f(\cdot)$  and this is unlikely to be available to  
148 a clinician or patient using such a model.

149 Given this, we have *post-hoc* methods such as LIME [3]<sup>1</sup> and Shapley-based methods  
150 [4] which both anchor the concept of “explainability” to perturbation of inputs to a model  
151 and observing changes in the output – analogous to classical linear regression, where we  
152 understand the concept of a change in the dependent variable for a unit-change in an  
153 independent variable.

154 To conclude this section, we define what we mean by **transparency** – using the  
155 same examples, both the neural network and the logistic regression models are equiv-  
156 alently **transparent** because the relationship between  $\mathbf{x}$  and the data the network is  
157 “ingesting” is straight-forward; that is, there is no pre-processing or feature engineer-  
158 ing/selection and we can assert that the activations of the input layer are identical to  
159 the data. We deem this to be an important property of the TIFU framework because if a  
160 model requires sophisticated pre-processing – for example, dimensionality reduction via  
161 principle components analysis with subsequent projection of each sample or input to the

---

<sup>1</sup>Of note, [3] do emphasise the concept of interpretability that we advocate for here

162 dimensionality-reduced feature space – clinicians will require further tools to understand  
163 how the data (representing patients in units of the original measurement scale) relates to  
164 the feature space the model operates on. It is not the case that pre-processing inputs to  
165 a model *precludes* transparency, rather, the engineering and presentation of the model  
166 must account for this transforming of inputs to a feature space so clinicians and patients  
167 can interrogate relationships.

168 **Supplementary References**

- 169 [1] A. Gelman, J. Hill, and A. Vehtari, *Regression and other stories*. Cambridge Uni-  
170 versity Press, 2020.
- 171 [2] J. C. Gower, “Some distance properties of latent root and vector methods used in  
172 multivariate analysis,” *Biometrika*, vol. 53, no. 3-4, pp. 325–338, 1966.
- 173 [3] M. T. Ribeiro, S. Singh, and C. Guestrin, “” why should i trust you?” explaining the  
174 predictions of any classifier,” in *Proceedings of the 22nd ACM SIGKDD international  
175 conference on knowledge discovery and data mining*, pp. 1135–1144, 2016.
- 176 [4] S. Lipovetsky and M. Conklin, “Analysis of regression in game theory approach,”  
177 *Applied Stochastic Models in Business and Industry*, vol. 17, no. 4, pp. 319–330,  
178 2001.
